# Supplementary material for: The “Real Welfare” Scheme: Changes in UK Finishing Pig Welfare since the Introduction of Formal Welfare Outcome Assessment
Source: MDPI journal article supplement (doi:10.3390/ani12050607), 2022-02-28
Supplement: s1 [file s1]

## Supplementary file

### Supplementary Material S1 Sampling and data collection.

The number of assessments per farm per year (2 to 4) depended on pig flow and was achieved during a quarterly visit from the farm veterinarian. All participating veterinarians were required to be members of the UK Pig Veterinary Society and were required to undergo online and practical training to ensure standardisation of recording [<http://pork.ahdb.org.uk/health-welfare/welfare/real-welfare/real-welfare-vets/>]. The assessment involved 5 main measures. Full details of the measurement protocol can be found at [<http://pork.ahdb.org.uk/health-welfare/welfare/real-welfare/>]. Tail lesions and body marks were assessed on a sample of pigs per pen, but pigs requiring hospitalization, lame pigs and enrichment use ratio were assessed for all pigs in the selected pens as this method improved the accuracy of the recording of these welfare outcomes which usually occur at low prevalence. The number of pens assessed at each visit were selected to be representative of the farm and to comply with the number of pigs required to be assessed each year for tail lesions and body marks. For units of 300 finisher places or less, a minimum of 300 pigs should be sampled each year, but for units of 900 finisher places or more, a total of 900 pigs should be sampled per year. For units of between 300 to 900 finisher places, an equivalent representative proportion should be sampled. The sampling of pigs within a pen was as follows: all pigs in the pen if there were fewer than 25 pigs, 25 pigs if there were up to 100 pigs in the pen, or 50 pigs if there were more than 100 pigs in the pen. Sampling more pigs than this per pen was allowed at the vets' discretion and if the total number of pigs required to be sampled on farm could not otherwise be reached (for instance if a farm has only few pens, but with many pigs). In this case, the recommendation was to divide the number of pigs needed from a pen type by the number of pens available (e.g. if 150 pigs were needed from two pens of 100, sample  $150/2 = 75$  pigs per pen). Data were preferentially collected from pigs of  $\geq 50$ kg liveweight, but if there were not enough pigs for the sample then pigs of  $\geq 30$ kg liveweight were also included in the sample.

### Supplementary Methods S1

The Augmented Dickey-Fuller Test (ADF) tests the null hypothesis that a unit root is present in a time series sample. The test evaluates the stationarity of a time series [1]. The Autocorrelation function (ACF) defines how data points in a time series are related, on average, to the preceding data points [1].

The Tukey's Honest Significant Difference (Tukey's HSD) method is used to test differences among sample means for significance. The Tukey's HSD tests all pairwise differences while controlling the probability of making one or more Type I errors [2].

Compact Letter Display (cld) is used to generate a compact letter display of all pairwise comparisons of estimated marginal means. When a P value exceeds alpha, then the two means have at least one letter in common [3].

#### References

1. Venables, W.N.; Ripley, B.D. *Modern Applied Statistics with S*, 4th ed.; Springer: New York, NY, USA, 2002.
2. Salkind, N.J. *Encyclopedia of Research Design*, SAGE Publications: Thousand Oaks, CA, USA, 2010.
3. Piepho, H.-P. An algorithm for a letter-based representation of all pairwise comparisons. *J. Comput. Graph. Stat.* **2004**, *13*, 456–466.

**Supplementary Table S1** The number of farms, pens, pen visits and pigs assessed for each lesion (including the mild lesions and enrichment use ratio) in each year of the scheme (For the calculations for each year, pens without a visit date have been excluded).

|                              | Pigs requiring hospitalization/<br>lame pigs | Severe lesions <sup>4</sup> | Mild lesions <sup>4</sup> | Enrichment use ratio <sup>2</sup> |
|------------------------------|----------------------------------------------|-----------------------------|---------------------------|-----------------------------------|
| Number of farms <sup>1</sup> | <b>2616</b>                                  | <b>2616</b>                 | <b>1371</b>               | <b>975</b>                        |
| 2013                         | 1202                                         | 1202                        | 1135                      | 872                               |
| 2014                         | 1555                                         | 1555                        | 409                       | 87                                |
| 2015                         | 1638                                         | 1638                        | 210                       | 35                                |
| 2016                         | 1641                                         | 1641                        | 176                       | 15                                |
| 2017                         | 1671                                         | 1671                        | 127                       | 12                                |
| 2018                         | 1526                                         | 1526                        | 107                       | 9                                 |
| 2019                         | 1615                                         | 1615                        | 64                        | 77                                |
| Number of pens <sup>1</sup>  | <b>65023</b>                                 | <b>65023</b>                | <b>26360</b>              | <b>7088</b>                       |
| 2013                         | 14225                                        | 14225                       | 12698                     | 6102                              |
| 2014                         | 22022                                        | 22022                       | 5782                      | 650                               |
| 2015                         | 24527                                        | 24527                       | 3877                      | 418                               |
| 2016                         | 22098                                        | 22098                       | 2715                      | 136                               |
| 2017                         | 22517                                        | 22517                       | 2063                      | 116                               |
| 2018                         | 20426                                        | 20426                       | 1483                      | 66                                |
| 2019                         | 20642                                        | 20642                       | 1050                      | 843                               |
| Number of pen visits         | <b>253713</b>                                | <b>253713</b>               | <b>42108</b>              | <b>11035</b>                      |
| 2013                         | 21445                                        | 21445                       | 18169                     | 8188                              |
| 2014                         | 38888                                        | 38888                       | 8455                      | 838                               |
| 2015                         | 40266                                        | 40266                       | 5194                      | 536                               |
| 2016                         | 37544                                        | 37544                       | 3747                      | 205                               |
| 2017                         | 40429                                        | 40429                       | 2982                      | 149                               |
| 2018                         | 36846                                        | 36846                       | 2120                      | 66                                |
| 2019                         | 38295                                        | 38295                       | 1441                      | 1053                              |
| Number of pigs               | <b>13678660</b>                              | <b>7112777</b>              | <b>1062755</b>            | <b>89165<sup>3</sup></b>          |
| 2013                         | 928902                                       | 520221                      | 440148                    | 64038                             |
| 2014                         | 1916291                                      | 1045362                     | 213212                    | 7785                              |
| 2015                         | 2005744                                      | 1078437                     | 129914                    | 4526                              |
| 2016                         | 1991931                                      | 1043692                     | 98619                     | 1944                              |
| 2017                         | 2313357                                      | 1226426                     | 85079                     | 1201                              |
| 2018                         | 2236311                                      | 1097757                     | 62139                     | 890                               |
| 2019                         | 2286124                                      | 1101782                     | 33644                     | 8781                              |

*1 Considering farms and pens may have been visited several times per year*

*2 Only the pens for which at least one animal was interacting with enrichment or other features or pen mates were included as these were the only ones for which it was possible to calculate an enrichment use ratio*

*3 Only pigs which interacted with enrichment or other features or pen mates were included, as these were the only ones for which it was possible to calculate an enrichment use ratio*

*4 Severe lesions: Pigs for which severe tail lesions and/or severe body marks were assessed. Mild lesions: Pigs for which minor tail lesions and /or minor body marks were assessed.*

**Pigs requiring hospitalization**

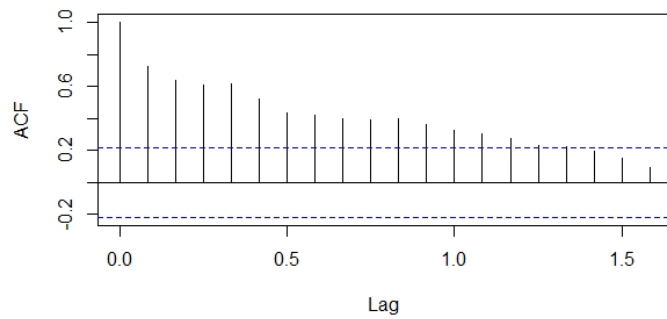

**Lame pigs**

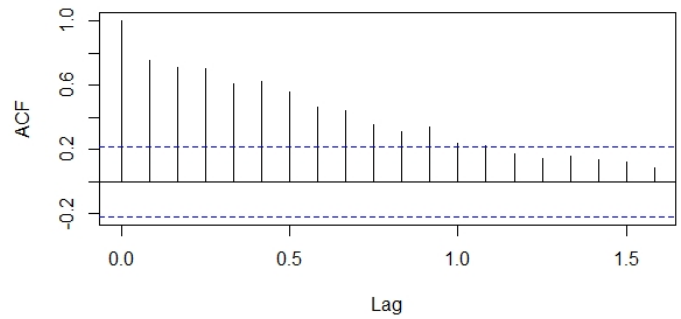

**Pigs with severe tail lesions**

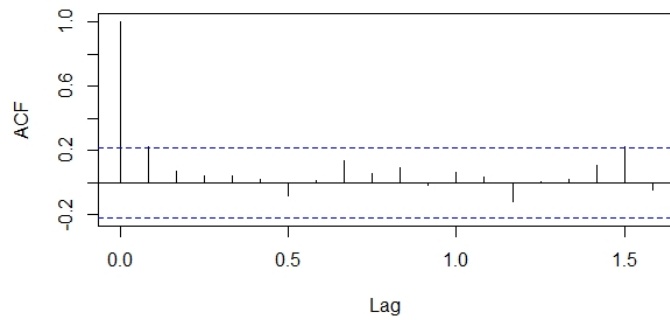

**Pigs with severe body marks**

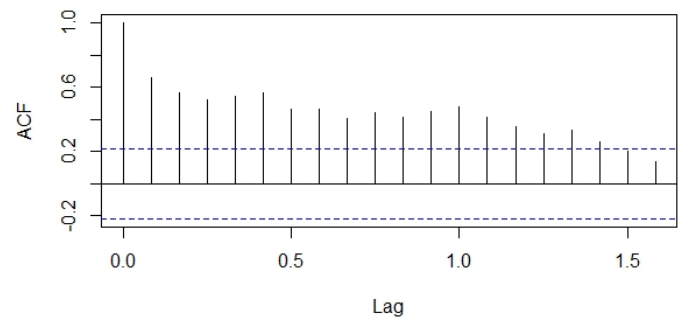

**Enrichment use ratio**

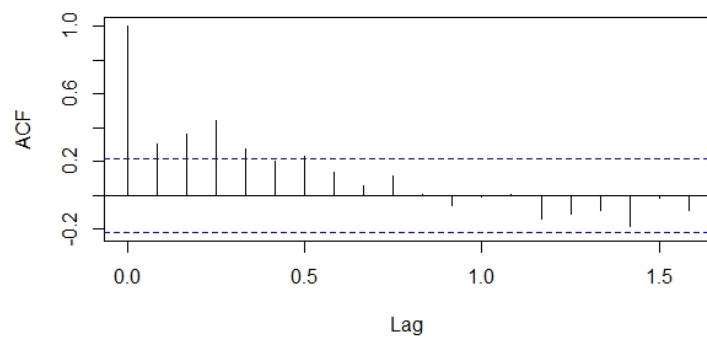

**Supplementary Figure S1** Autocorrelation function (ACF) (with lag= fixed amount of passing time) for the percentage of pigs requiring hospitalization, lame pigs from, pigs with severe tail lesions, severe body marks and enrichment use ratio April 2013 to December 2019.

**Supplementary Table S2** Changes over years compared to 2013 for the different welfare outcomes: Odds ratio, confidence intervals and P-value for all pens included in the study.

|                                       |      | <b>Odd ratio</b> | <b>CI 95%</b> |       | <b>P-value</b> |
|---------------------------------------|------|------------------|---------------|-------|----------------|
| <b>Pigs requiring hospitalization</b> | 2013 | <i>Intercept</i> |               |       |                |
|                                       | 2014 | 0.647            | 0.586         | 0.713 | < <b>0.001</b> |
|                                       | 2015 | 0.362            | 0.324         | 0.404 | < <b>0.001</b> |
|                                       | 2016 | 0.256            | 0.227         | 0.290 | < <b>0.001</b> |
|                                       | 2017 | 0.259            | 0.230         | 0.292 | < <b>0.001</b> |
|                                       | 2018 | 0.228            | 0.201         | 0.259 | < <b>0.001</b> |
|                                       | 2019 | 0.199            | 0.174         | 0.227 | < <b>0.001</b> |
| <b>Lameness</b>                       | 2013 | <i>Intercept</i> |               |       |                |
|                                       | 2014 | 0.552            | 0.521         | 0.586 | < <b>0.001</b> |
|                                       | 2015 | 0.379            | 0.355         | 0.404 | < <b>0.001</b> |
|                                       | 2016 | 0.221            | 0.205         | 0.238 | < <b>0.001</b> |
|                                       | 2017 | 0.212            | 0.197         | 0.229 | < <b>0.001</b> |
|                                       | 2018 | 0.444            | 0.415         | 0.476 | < <b>0.001</b> |
|                                       | 2019 | 0.196            | 0.180         | 0.212 | < <b>0.001</b> |
| <b>Severe tail lesions</b>            | 2013 | <i>Intercept</i> |               |       |                |
|                                       | 2014 | 1.368            | 1.233         | 1.517 | < <b>0.001</b> |
|                                       | 2015 | 1.217            | 1.095         | 1.353 | < <b>0.001</b> |
|                                       | 2016 | 1.112            | 0.997         | 1.241 | 0.057          |
|                                       | 2017 | 1.002            | 0.898         | 1.119 | 0.968          |
|                                       | 2018 | 1.208            | 1.082         | 1.350 | <b>0.001</b>   |
|                                       | 2019 | 1.459            | 1.308         | 1.629 | < <b>0.001</b> |
| <b>Severe body marks</b>              | 2013 | <i>Intercept</i> |               |       |                |
|                                       | 2014 | 1.063            | 0.992         | 1.139 | 0.084          |
|                                       | 2015 | 0.827            | 0.769         | 0.889 | < <b>0.001</b> |
|                                       | 2016 | 0.563            | 0.520         | 0.609 | < <b>0.001</b> |
|                                       | 2017 | 0.349            | 0.321         | 0.381 | < <b>0.001</b> |
|                                       | 2018 | 0.327            | 0.299         | 0.359 | < <b>0.001</b> |
|                                       | 2019 | 0.303            | 0.276         | 0.333 | < <b>0.001</b> |
| <b>Enrichment use ratio</b>           | 2013 | <i>Intercept</i> |               |       |                |
|                                       | 2014 | 1.018            | 0.930         | 1.114 | 0.697          |
|                                       | 2015 | 1.101            | 1.013         | 1.198 | <b>0.024</b>   |
|                                       | 2016 | 1.520            | 1.372         | 1.685 | < <b>0.001</b> |
|                                       | 2017 | 1.542            | 1.351         | 1.759 | < <b>0.001</b> |
|                                       | 2018 | 1.154            | 0.986         | 1.351 | 0.075          |
|                                       | 2019 | 2.656            | 2.198         | 3.210 | < <b>0.001</b> |

**Supplementary Table S3** Changes over years compared to 2013 for the minor welfare outcomes: Odds ratio, confidence intervals and P-value for all pens with minor lesions recorded (42,108 pens).

|                          |                  | <b>Odd ratio</b> | <b>CI 95%</b> | <b>P-value</b> |
|--------------------------|------------------|------------------|---------------|----------------|
| <b>Mild tail lesions</b> |                  |                  |               |                |
| 2013                     | <i>Intercept</i> |                  |               |                |
| 2014                     | 0.619            | 0.572            | 0.670         | < <b>0.001</b> |
| 2015                     | 0.535            | 0.482            | 0.595         | < <b>0.001</b> |
| 2016                     | 0.428            | 0.378            | 0.484         | < <b>0.001</b> |
| 2017                     | 0.793            | 0.703            | 0.895         | < <b>0.001</b> |
| 2018                     | 0.348            | 0.295            | 0.412         | < <b>0.001</b> |
| 2019                     | 0.358            | 0.291            | 0.439         | < <b>0.001</b> |
| <b>Dirty tails</b>       |                  |                  |               |                |
| 2013                     | <i>Intercept</i> |                  |               |                |
| 2014                     | 0.568            | 0.543            | 0.594         | < <b>0.001</b> |
| 2015                     | 0.411            | 0.387            | 0.436         | < <b>0.001</b> |
| 2016                     | 0.916            | 0.856            | 0.980         | <b>0.0106</b>  |
| 2017                     | 0.773            | 0.722            | 0.827         | < <b>0.001</b> |
| 2018                     | 1.120            | 1.003            | 1.251         | <b>0.0439</b>  |
| 2019                     | 1.133            | 0.999            | 1.284         | 0.0511         |
| <b>Mild body marks</b>   |                  |                  |               |                |
| 2013                     | <i>Intercept</i> |                  |               |                |
| 2014                     | 0.277            | 0.268            | 0.286         | < <b>0.001</b> |
| 2015                     | 0.244            | 0.235            | 0.254         | < <b>0.001</b> |
| 2016                     | 0.210            | 0.201            | 0.220         | < <b>0.001</b> |
| 2017                     | 0.119            | 0.113            | 0.125         | < <b>0.001</b> |
| 2018                     | 0.088            | 0.083            | 0.094         | < <b>0.001</b> |
| 2019                     | 0.049            | 0.044            | 0.054         | < <b>0.001</b> |
| <b>Dirty bodies</b>      |                  |                  |               |                |
| 2013                     | <i>Intercept</i> |                  |               |                |
| 2014                     | 0.741            | 0.697            | 0.788         | < <b>0.001</b> |
| 2015                     | 0.654            | 0.605            | 0.708         | < <b>0.001</b> |
| 2016                     | 0.825            | 0.754            | 0.904         | < <b>0.001</b> |
| 2017                     | 1.037            | 0.947            | 1.135         | 0.435          |
| 2018                     | 1.910            | 1.666            | 2.191         | < <b>0.001</b> |
| 2019                     | 1.816            | 1.569            | 2.103         | < <b>0.001</b> |

**Supplementary Table S4** P-values for pair-wise comparison between years with Tukey's HSD for the proportion of pigs requiring hospitalization, lame pigs, pigs with severe tail lesions, pigs with severe body marks and enrichment use ratio.

| Pair-wise comparisons between Year1-year2 | Pigs requiring hospitalization <sup>1</sup> | Lame pigs <sup>1</sup> | Severe tail lesions <sup>2</sup> | Severe body marks <sup>1</sup> | Enrichment use ratio <sup>2</sup> |
|-------------------------------------------|---------------------------------------------|------------------------|----------------------------------|--------------------------------|-----------------------------------|
| 2014 - 2013                               | < <b>0.001</b>                              | < <b>0.001</b>         | < <b>0.001</b>                   | 1.0000                         | 0.152                             |
| 2015 - 2013                               | < <b>0.001</b>                              | < <b>0.001</b>         | <b>0.00243</b>                   | < <b>0.001</b>                 | < <b>0.001</b>                    |
| 2016 - 2013                               | < <b>0.001</b>                              | < <b>0.001</b>         | 0.30154                          | < <b>0.001</b>                 | < <b>0.001</b>                    |
| 2017 - 2013                               | < <b>0.001</b>                              | < <b>0.001</b>         | 0.99907                          | < <b>0.001</b>                 | 0.370                             |
| 2018 - 2013                               | < <b>0.001</b>                              | < <b>0.001</b>         | <b>0.00711</b>                   | < <b>0.001</b>                 | < <b>0.001</b>                    |
| 2019 - 2013                               | < <b>0.001</b>                              | < <b>0.001</b>         | < <b>0.001</b>                   | < <b>0.001</b>                 | < <b>0.001</b>                    |
| 2015 - 2014                               | < <b>0.001</b>                              | < <b>0.001</b>         | 1.00000                          | < <b>0.001</b>                 | < <b>0.001</b>                    |
| 2016 - 2014                               | < <b>0.001</b>                              | < <b>0.001</b>         | 1.00000                          | < <b>0.001</b>                 | < <b>0.001</b>                    |
| 2017 - 2014                               | < <b>0.001</b>                              | < <b>0.001</b>         | 1.00000                          | < <b>0.001</b>                 | 0.968                             |
| 2018 - 2014                               | < <b>0.001</b>                              | < <b>0.001</b>         | 1.00000                          | < <b>0.001</b>                 | < <b>0.001</b>                    |
| 2019 - 2014                               | < <b>0.001</b>                              | < <b>0.001</b>         | 0.46530                          | < <b>0.001</b>                 | < <b>0.001</b>                    |
| 2016 - 2015                               | < <b>0.001</b>                              | < <b>0.001</b>         | 1.00000                          | < <b>0.001</b>                 | 0.998                             |
| 2017 - 2015                               | < <b>0.001</b>                              | < <b>0.001</b>         | 1.00000                          | < <b>0.001</b>                 | 1.000                             |
| 2018 - 2015                               | < <b>0.001</b>                              | 1.0000                 | 0.99996                          | < <b>0.001</b>                 | < <b>0.001</b>                    |
| 2019 - 2015                               | < <b>0.001</b>                              | < <b>0.001</b>         | < <b>0.001</b>                   | < <b>0.001</b>                 | < <b>0.001</b>                    |
| 2017 - 2016                               | 0.99997                                     | 0.8095                 | 1.00000                          | < <b>0.001</b>                 | 1.000                             |
| 2018 - 2016                               | 0.37498                                     | 1.0000                 | 0.22093                          | < <b>0.001</b>                 | < <b>0.001</b>                    |
| 2019 - 2016                               | <b>0.00299</b>                              | <b>0.0303</b>          | < <b>0.001</b>                   | < <b>0.001</b>                 | < <b>0.001</b>                    |
| 2018 - 2017                               | 0.22093                                     | 1.0000                 | < <b>0.001</b>                   | 0.5405                         | < <b>0.001</b>                    |
| 2019 - 2017                               | < <b>0.001</b>                              | 0.2393                 | < <b>0.001</b>                   | <b>0.0136</b>                  | < <b>0.001</b>                    |
| 2019 - 2018                               | 0.24065                                     | < <b>0.001</b>         | < <b>0.001</b>                   | 0.4344                         | 1.000                             |

<sup>1</sup> pair-wise comparison: if  $P < 0.05$  year1 < year2

<sup>2</sup> pair-wise comparison: if  $P < 0.05$  year1 > year2

**Supplementary Table S5** P-values for pair-wise comparison between years with Tukey's HSD for the proportion of pigs with mild tail lesions, dirty tails, mild body marks, dirty bodies.

| Pair-wise comparisons between year1-year2 | Mild tail lesions <sup>1</sup> | Dirty tails <sup>2</sup> | Mild body marks <sup>1</sup> | Dirty bodies <sup>2</sup> |
|-------------------------------------------|--------------------------------|--------------------------|------------------------------|---------------------------|
| 2014 - 2013                               | < <b>0.001</b>                 | 1.00000                  | < <b>0.001</b>               | 1.0000                    |
| 2015 - 2013                               | < <b>0.001</b>                 | 1.00000                  | < <b>0.001</b>               | 1.0000                    |
| 2016 - 2013                               | < <b>0.001</b>                 | 1.00000                  | < <b>0.001</b>               | 1.0000                    |
| 2017 - 2013                               | <b>0.00142</b>                 | 1.00000                  | < <b>0.001</b>               | 0.8751                    |
| 2018 - 2013                               | < <b>0.001</b>                 | 0.22053                  | < <b>0.001</b>               | < <b>0.001</b>            |
| 2019 - 2013                               | < <b>0.001</b>                 | 0.24868                  | < <b>0.001</b>               | < <b>0.001</b>            |
| 2015 - 2014                               | <b>0.03356</b>                 | 1.00000                  | < <b>0.001</b>               | 1.0000                    |
| 2016 - 2014                               | < <b>0.001</b>                 | < <b>0.001</b>           | < <b>0.001</b>               | 0.0766                    |
| 2017 - 2014                               | 1.00000                        | < <b>0.001</b>           | < <b>0.001</b>               | < <b>0.001</b>            |
| 2018 - 2014                               | < <b>0.001</b>                 | < <b>0.001</b>           | < <b>0.001</b>               | < <b>0.001</b>            |
| 2019 - 2014                               | < <b>0.001</b>                 | < <b>0.001</b>           | < <b>0.001</b>               | < <b>0.001</b>            |
| 2016 - 2015                               | <b>0.00458</b>                 | < <b>0.001</b>           | < <b>0.001</b>               | < <b>0.001</b>            |
| 2017 - 2015                               | 1.00000                        | < <b>0.001</b>           | < <b>0.001</b>               | < <b>0.001</b>            |
| 2018 - 2015                               | < <b>0.001</b>                 | < <b>0.001</b>           | < <b>0.001</b>               | < <b>0.001</b>            |
| 2019 - 2015                               | <b>0.00140</b>                 | < <b>0.001</b>           | < <b>0.001</b>               | < <b>0.001</b>            |
| 2017 - 2016                               | 1.00000                        | 1.00000                  | < <b>0.001</b>               | < <b>0.001</b>            |
| 2018 - 2016                               | 0.13620                        | <b>0.00484</b>           | < <b>0.001</b>               | < <b>0.001</b>            |
| 2019 - 2016                               | 0.42814                        | <b>0.01062</b>           | < <b>0.001</b>               | < <b>0.001</b>            |
| 2018 - 2017                               | < <b>0.001</b>                 | < <b>0.001</b>           | < <b>0.001</b>               | < <b>0.001</b>            |
| 2019 - 2017                               | < <b>0.001</b>                 | < <b>0.001</b>           | < <b>0.001</b>               | < <b>0.001</b>            |
| 2019 - 2018                               | 0.99995                        | 0.98993                  | < <b>0.001</b>               | 1.0000                    |

<sup>1</sup> Pair-wise comparison: if  $P < 0.05$  year1 < year2

<sup>2</sup> Pair-wise comparison: if  $P < 0.05$  year1 > year2

**Supplementary Table S6** Changes over seasons compared to winter for the mandatory welfare outcomes and enrichment use ratio: Odds ratio, confidence intervals and P-value for all pens included in the study.

|                                | Odd<br>ratio | CI 95% |       | P-value           |
|--------------------------------|--------------|--------|-------|-------------------|
| Pigs requiring hospitalization |              |        |       |                   |
| Winter                         | Base level   |        |       |                   |
| Autumn                         | 1.105        | 1.018  | 1.198 | <b>0.016</b>      |
| Spring                         | 0.873        | 0.801  | 0.952 | <b>0.002</b>      |
| Summer                         | 0.944        | 0.869  | 1.026 | 0.177             |
| Lameness                       |              |        |       |                   |
| Winter                         | Base level   |        |       |                   |
| Autumn                         | 0.961        | 0.917  | 1.008 | 0.101             |
| Spring                         | 1.255        | 1.198  | 1.314 | <b>&lt; 0.001</b> |
| Summer                         | 0.856        | 0.816  | 0.899 | <b>&lt; 0.001</b> |
| Severe tail lesions            |              |        |       |                   |
| Winter                         | Base level   |        |       |                   |
| Autumn                         | 1.224        | 1.155  | 1.297 | <b>&lt; 0.001</b> |
| Spring                         | 1.166        | 1.098  | 1.239 | <b>&lt; 0.001</b> |
| Summer                         | 1.033        | 0.973  | 1.096 | 0.293             |
| Severe body<br>marks           |              |        |       |                   |
| Winter                         | Base level   |        |       |                   |
| Autumn                         | 0.946        | 0.897  | 0.999 | <b>0.044</b>      |
| Spring                         | 1.042        | 0.987  | 1.101 | 0.138             |
| Summer                         | 0.987        | 0.936  | 1.042 | 0.640             |
| Enrichment use ratio           |              |        |       |                   |
| Winter                         | Base level   |        |       |                   |
| Autumn                         | 0.850        | 0.780  | 0.925 | <b>&lt; 0.001</b> |
| Spring                         | 0.668        | 0.612  | 0.730 | <b>&lt; 0.001</b> |
| Summer                         | 0.633        | 0.582  | 0.690 | <b>&lt; 0.001</b> |

**Supplementary Table S7** values for pair-wise comparison between seasons with Tukey's HSD for the proportion of pigs requiring hospitalization, lame pigs, pigs with severe tail lesions, pigs with severe body marks and enrichment use ratio.

| Pair-wise comparisons between seasons | Pigs requiring hospitalization <sup>2</sup> | Lame pigs <sup>2</sup> | Severe tail lesions <sup>1</sup> | Severe body marks <sup>1</sup> | Enrichment use ratio <sup>2</sup> |
|---------------------------------------|---------------------------------------------|------------------------|----------------------------------|--------------------------------|-----------------------------------|
| autumn - spring                       | < <b>0.001</b>                              | 1.000                  | 1.0000                           | < <b>0.001</b>                 | < <b>0.001</b>                    |
| summer - spring                       | 0.15703                                     | 1.000                  | < <b>0.001</b>                   | 0.101                          | 1.0000                            |
| winter - spring                       | <b>0.00565</b>                              | 1.000                  | < <b>0.001</b>                   | 0.276                          | < <b>0.001</b>                    |
| summer - autumn                       | 1.00000                                     | 1.000                  | < <b>0.001</b>                   | 1.000                          | 1.0000                            |
| winter - autumn                       | 1.00000                                     | 0.216                  | < <b>0.001</b>                   | 1.000                          | < <b>0.001</b>                    |
| winter - summer                       | 0.3365                                      | < <b>0.001</b>         | 0.4907                           | 0.997                          | < <b>0.001</b>                    |

<sup>1</sup> Pair-wise comparison: if  $P < 0.05$  year1 < year2

<sup>2</sup> Pair-wise comparison: if  $P < 0.05$  year1 > year2



**Supplementary Table S9** Annual mean and calculated margin of error considering the sampling size of each year (accounting for the design effect) and 80% power for all welfare outcomes.

|                      | Pigs requiring hospitalization | Lame pigs | Severe tail lesions | Severe body marks | Enrichment use ratio | Mild tail lesions | Mild body marks | Dirty tails | Dirty bodies |
|----------------------|--------------------------------|-----------|---------------------|-------------------|----------------------|-------------------|-----------------|-------------|--------------|
| Mean 2013            | 0.14                           | 0.34      | 0.16                | 0.29              | 47.1                 | 1.76              | 13.09           | 5.77        | 3.06         |
| Mean 2014            | 0.10                           | 0.22      | 0.20                | 0.34              | 49.8                 | 0.98              | 5.36            | 3.27        | 2.17         |
| Mean 2015            | 0.06                           | 0.16      | 0.16                | 0.25              | 43.9                 | 0.68              | 5.35            | 3.99        | 2.76         |
| Mean 2016            | 0.04                           | 0.11      | 0.15                | 0.20              | 50.3                 | 0.61              | 5.74            | 5.85        | 3.61         |
| Mean 2017            | 0.03                           | 0.10      | 0.14                | 0.13              | 39.4                 | 0.87              | 5.19            | 8.31        | 4.59         |
| Mean 2018            | 0.03                           | 0.14      | 0.15                | 0.12              | 64.1                 | 0.42              | 3.74            | 4.68        | 4.68         |
| Mean 2019            | 0.03                           | 0.09      | 0.20                | 0.11              | 64.1                 | 0.56              | 1.74            | 4.77        | 4.82         |
| Margin of error 2013 | 0.041                          | 0.081     | 0.080               | 0.113             | 2.31                 | 0.26              | 0.71            | 0.92        | 0.75         |
| Margin of error 2014 | 0.027                          | 0.038     | 0.072               | 0.085             | 6.50                 | 0.32              | 0.80            | 1.23        | 1.04         |
| Margin of error 2015 | 0.021                          | 0.033     | 0.055               | 0.071             | 8.55                 | 0.30              | 1.06            | 1.69        | 1.51         |
| Margin of error 2016 | 0.029                          | 0.031     | 0.063               | 0.072             | 9.88                 | 0.45              | 1.15            | 2.62        | 1.96         |
| Margin of error 2017 | 0.028                          | 0.028     | 0.055               | 0.052             | 17.65                | 0.82              | 1.25            | 3.72        | 2.53         |
| Margin of error 2018 | 0.017                          | 0.048     | 0.068               | 0.055             | 30.97                | 0.40              | 1.13            | 3.32        | 3.36         |
| Margin of error 2019 | 0.022                          | 0.024     | 0.075               | 0.044             | 4.42                 | 0.72              | 0.99            | 3.97        | 4.02         |
